# Supplementary material
Source: PubMed Central journal article supplement (PMC3590919)
Supplement: NIHMS445415-supplement-1.pdf [file NIHMS445415-supplement-1.pdf]

**a****WT-JNK**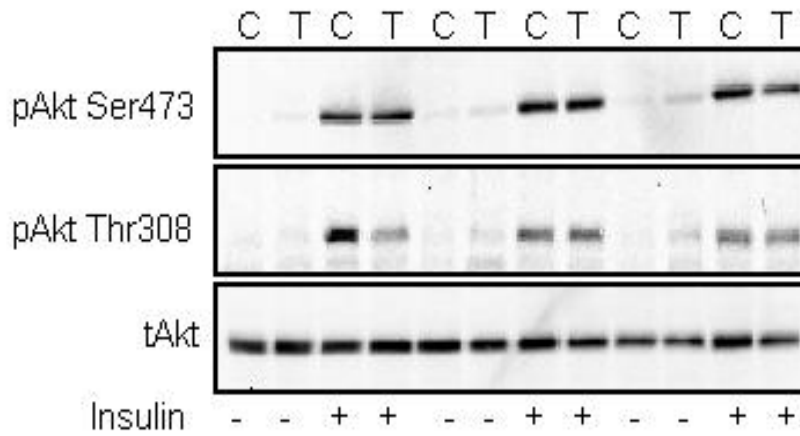**b****CA-JNK**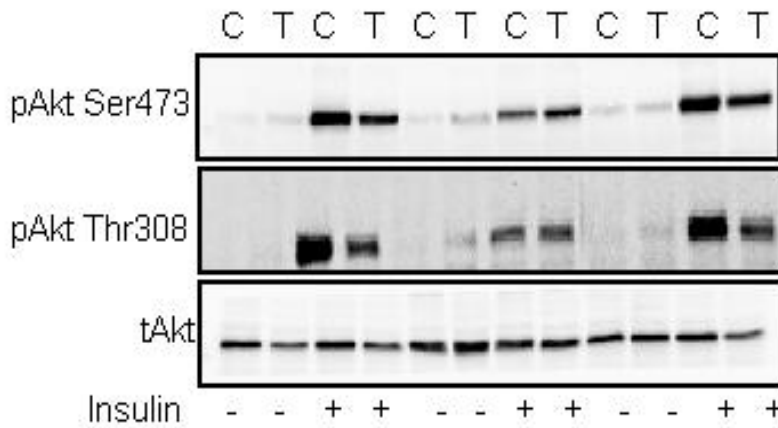

**Supplementary Figure 1.** Western blots depicting phosphorylation of Akt (Ser<sup>473</sup> and Thr<sup>308</sup>) and total Akt in *tibialis anterior* muscles following gene transfer in both a basal un-stimulated cohort (-) and insulin stimulated (+) cohort of mice with either WT-JNK overexpression (a) or CA-JNK overexpression (b).
