# Supplementary material
Source: PubMed Central journal article supplement (PMC3590919)
Supplement: NIHMS445415-supplement-2.pdf [file NIHMS445415-supplement-2.pdf]

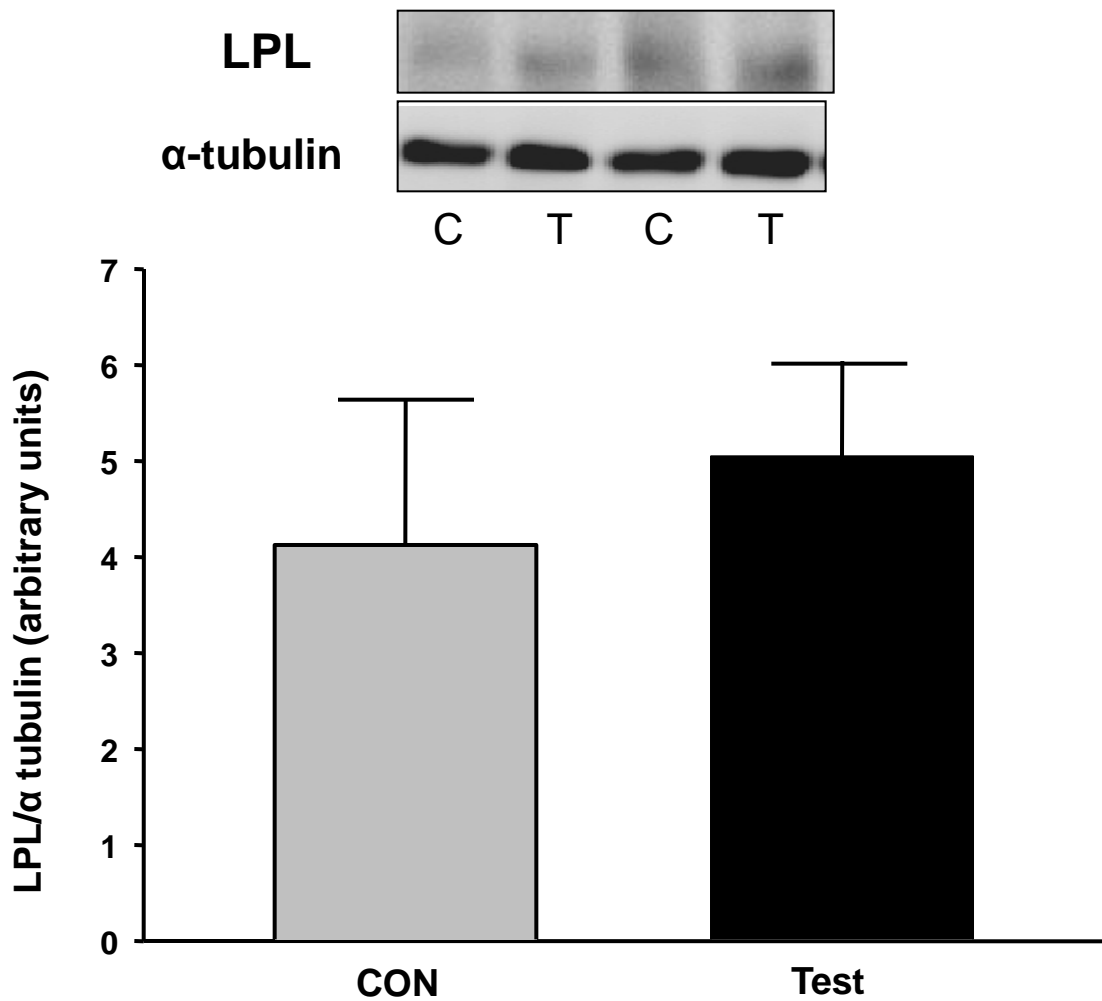

**Supplementary Figure 2:** Representative Western blots and quantification of Lipoprotein lipase (LPL)/  $\alpha$ -tubulin in *tibialis anterior* muscle from C57Bl/6 mice 7-days following electroporation of an empty vector (CON; Gray bars) or CA-JNK (Test; black bars) plasmid. Data expressed as mean  $\pm$  SEM, n= 5 per group.
