# Supplementary material
Source: PubMed Central journal article supplement (PMC3590919)
Supplement: NIHMS445415-supplement-3.pdf [file NIHMS445415-supplement-3.pdf]

**Supplementary Table 1**

| <b>Lipid</b>           | <b>CON</b>  | <b>CA-JNK</b> |
|------------------------|-------------|---------------|
| <b>Total TAGs</b>      | 1.00 ± 0.21 | 0.78 ± 0.12   |
| <b>Total DAGs</b>      | 1.00 ± 0.26 | 1.34 ± 0.18   |
| <b>Total Ceramides</b> | 1.00 ± 0.15 | 0.91 ± 0.04   |

**Supplementary Table 1:** Total Triacylglycerol (TAG), Diacylglycerol (DAG) and Ceramide in *tibialis anterior* muscle from C57Bl/6 mice 7-days following electroporation of an empty vector (CON) or CA-JNK plasmid. Data expressed as levels relative to control and mean ± SEM, n= 9 per group.
